# Supplementary material for: Accurate Training of The Cox Proportional Hazards Model on Vertically-Partitioned Data While Preserving Privacy
Source: Research Square preprint supplement (doi:10.21203/rs.3.rs-602219/v1), 2021-07-06
Supplement: Supplementary file [file 73e4d979fc204316449686d2.pdf]

# Additional file 1

## Exponentiation approximation

Bart Kamphorst, Thomas Rooijakkers, Thijs Veugen, Matteo Cellamare, Daan Knoors

This additional file describes the details of the MacLaurin series approximation in section “Secure exponentiation protocol”, subsection “Non-integer exponent”. The MacLaurin series of  $e^s$  can, for any  $\tilde{k} \geq 0$ , be represented as:

$$e^s = \sum_{k=0}^{\infty} \frac{s^k}{k!} = \sum_{k=0}^{\tilde{k}} \frac{s^k}{k!} + \sum_{k=\tilde{k}+1}^{\infty} \frac{s^k}{k!}. \quad (1)$$

From this expression, we find an upper for the absolute difference between  $e^s$  and the finite sum:

$$\begin{aligned} 0 &\leq \left| e^s - \sum_{k=0}^{\tilde{k}} \frac{s^k}{k!} \right| = \left| \sum_{k=\tilde{k}+1}^{\infty} \frac{s^k}{k!} \right| \\ &\leq \frac{|s|^{\tilde{k}+1}}{(\tilde{k}+1)!} \left| \sum_{k=\tilde{k}+1}^{\infty} \frac{s^{k-\tilde{k}-1}}{(k-\tilde{k}-1)!} \right| = \frac{|s|^{\tilde{k}+1}}{(\tilde{k}+1)!} |e^s|. \end{aligned} \quad (2)$$

We now substitute  $s = z \log(a)$ ,  $a > 0$ , to find

$$0 \leq \left| a^z - \sum_{k=0}^{\tilde{k}} \frac{(z \log(a))^k}{k!} \right| \leq \frac{|z \log(a)|^{\tilde{k}+1}}{(\tilde{k}+1)!} |a^z|. \quad (3)$$

For a given base  $a$  and a given range  $[-Z, Z]$  that contains  $z$ , the relative error of the approximation can be made arbitrarily small by choosing suitably large  $\tilde{k}$ . To see this, recall that the factorial function grows faster than any function that grows polynomially (in the logarithm of the argument).
